# Supplementary material for: Effect of polarizable lone pair cations on the second-harmonic generation (SHG) properties of noncentrosymmetric (NCS) Bi2−xYxTeO5(x = 0–0.2)
Source: Royal Society of Chemistry journal article supplement (doi:10.1039/c4dt01060d), 2014-05-09

Electronic Supplementary Information (ESI) for:

**Effect of polarizable lone pair cations on the second-harmonic generation (SHG) properties of noncentrosymmetric (NCS)  $\text{Bi}_{2-x}\text{Y}_x\text{TeO}_5$  ( $x = 0-0.2$ )**

Hongil Jo, Yeong Hun Kim, Dong Woo Lee, and Kang Min Ok\*

Department of Chemistry, Chung-Ang University, 84 Heukseok-ro, Dongjak-gu, Seoul 156-756,  
Republic of Korea

Table S1. Atomic Coordinates, Displacement Parameters, and Occupancies for  $\text{Bi}_2\text{TeO}_5$

Table S2. Atomic Coordinates, Displacement Parameters, and Occupancies for  $\text{Bi}_{1.9}\text{Y}_{0.1}\text{TeO}_5$

Table S3. Atomic Coordinates, Displacement Parameters, and Occupancies for  $\text{Bi}_{1.8}\text{Y}_{0.2}\text{TeO}_5$

Figure S1. Infrared spectra of  $\text{Bi}_{2-x}\text{Y}_x\text{TeO}_5$  ( $x = 0, 0.1, \text{ and } 0.2$ )

Figure S2. Phase matching, i.e., particle size vs. SHG intensity data for  $\text{Bi}_2\text{TeO}_5$ . The curve is drawn to guide the eye and is not a fit to the data.

Figure S3. Phase matching, i.e., particle size vs. SHG intensity data for  $\text{Bi}_{1.9}\text{Y}_{0.1}\text{TeO}_5$ . The curve is drawn to guide the eye and is not a fit to the data.

Figure S4. Phase matching, i.e., particle size vs. SHG intensity data for  $\text{Bi}_{1.8}\text{Y}_{0.2}\text{TeO}_5$ . The curve is drawn to guide the eye and is not a fit to the data.

Figure S5. EDAX spectra for  $\text{Bi}_{2-x}\text{Y}_x\text{TeO}_5$  ( $x = 0, 0.1, \text{ and } 0.2$ )

Table S1. Atomic Coordinates, Displacement Parameters, and Occupancies for Bi<sub>2</sub>TeO<sub>5</sub>

| <i>Atom</i> | <i>x</i>    | <i>y</i>    | <i>z</i>    | <i>U<sub>iso</sub></i> | <i>Occupancy</i> |
|-------------|-------------|-------------|-------------|------------------------|------------------|
| Bi(1)       | 0.39169(7)  | 0.08574(11) | 0.4848(6)   | 0.0073(3)              | 1.0              |
| Bi(2)       | 0.87472(16) | 0.25        | 0.0009(3)   | 0.0068(4)              | 1.0              |
| Bi(3)       | 0.62249(18) | 0.25        | 0.52333(19) | 0.0040(3)              | 1.0              |
| Te(1)       | 0.13291(14) | 0.08008(14) | -0.0154(3)  | 0.0059(4)              | 1.0              |
| O(1)        | 0.26339(19) | 0.04448(14) | 0.1439(3)   | 0.0209(4)              | 1.0              |
| O(2)        | 0.5         | 0           | 0.7942(3)   | 0.0110(4)              | 1.0              |
| O(3)        | 0.06710(19) | 0.14761(15) | 0.2224(3)   | 0.0198(4)              | 1.0              |
| O(4)        | 0.7081(3)   | 0.25        | 0.8703(3)   | 0.0170(4)              | 1.0              |
| O(5)        | 0.47924(16) | 0.16057(14) | 0.2041(3)   | 0.0109(4)              | 1.0              |
| O(6)        | 0.20457(15) | 0.15767(14) | 0.7881(3)   | 0.0161(4)              | 1.0              |

Table S2. Atomic Coordinates, Displacement Parameters, and Occupancies for Bi<sub>1.9</sub>Y<sub>0.1</sub>TeO<sub>5</sub>

| <i>Atom</i> | <i>x</i>    | <i>y</i>    | <i>z</i>   | <i>U<sub>iso</sub></i> | <i>Occupancy</i> |
|-------------|-------------|-------------|------------|------------------------|------------------|
| Bi(1)/Y(1)  | 0.39170(10) | 0.08556(16) | 0.4844(5)  | 0.0073(3)              | 0.95/0.05        |
| Bi(2)/Y(2)  | 0.8740(3)   | 0.25        | 0.0009(7)  | 0.0165(3)              | 0.95/0.05        |
| Bi(3)/Y(3)  | 0.6222(3)   | 0.25        | 0.5222(5)  | 0.0118(4)              | 0.95/0.05        |
| Te(1)       | 0.13287(19) | 0.0805(2)   | -0.0187(7) | 0.0055(4)              | 1.0              |
| O(1)        | 0.2652(3)   | 0.0442(2)   | 0.1443(8)  | 0.0290(4)              | 1.0              |
| O(2)        | 0.5         | 0           | 0.7901(7)  | 0.0095(3)              | 1.0              |
| O(3)        | 0.0681(3)   | 0.1475(3)   | 0.2223(8)  | 0.0270(4)              | 1.0              |
| O(4)        | 0.7076(5)   | 0.25        | 0.8688(8)  | 0.0201(4)              | 1.0              |
| O(5)        | 0.4795(2)   | 0.16027(19) | 0.2016(5)  | 0.0093(4)              | 1.0              |
| O(6)        | 0.2057(3)   | 0.1580(3)   | 0.7835(7)  | 0.0268(4)              | 1.0              |

Table S3. Atomic Coordinates, Displacement Parameters, and Occupancies for  $\text{Bi}_{1.8}\text{Y}_{0.2}\text{TeO}_5$

| <i>Atom</i> | <i>x</i>    | <i>y</i>    | <i>z</i>   | $U_{iso}$ | <i>Occupancy</i> |
|-------------|-------------|-------------|------------|-----------|------------------|
| Bi(1)/Y(1)  | 0.39129(11) | 0.08551(19) | 0.4849(6)  | 0.0081(3) | 0.90/0.10        |
| Bi(2)/Y(2)  | 0.8740(3)   | 0.25        | 0.0013(9)  | 0.0251(3) | 0.90/0.10        |
| Bi(3)/Y(3)  | 0.6212(3)   | 0.25        | 0.5229(6)  | 0.0170(3) | 0.90/0.10        |
| Te(1)       | 0.1328(2)   | 0.0805(2)   | -0.0171(8) | 0.0059(3) | 1.0              |
| O(1)        | 0.2663(4)   | 0.0439(3)   | 0.1423(10) | 0.0405(4) | 1.0              |
| O(2)        | 0.5         | 0           | 0.7882(8)  | 0.0089(3) | 1.0              |
| O(3)        | 0.0680(3)   | 0.1478(3)   | 0.2237(10) | 0.0363(3) | 1.0              |
| O(4)        | 0.7079(6)   | 0.25        | 0.8699(10) | 0.0266(3) | 1.0              |
| O(5)        | 0.4801(3)   | 0.1604(2)   | 0.2012(6)  | 0.0102(4) | 1.0              |
| O(6)        | 0.2062(3)   | 0.1580(3)   | 0.7807(9)  | 0.0322(3) | 1.0              |

Figure S1. Infrared spectra of  $\text{Bi}_{2-x}\text{Y}_x\text{TeO}_5$  ( $x = 0, 0.1, \text{ and } 0.2$ )

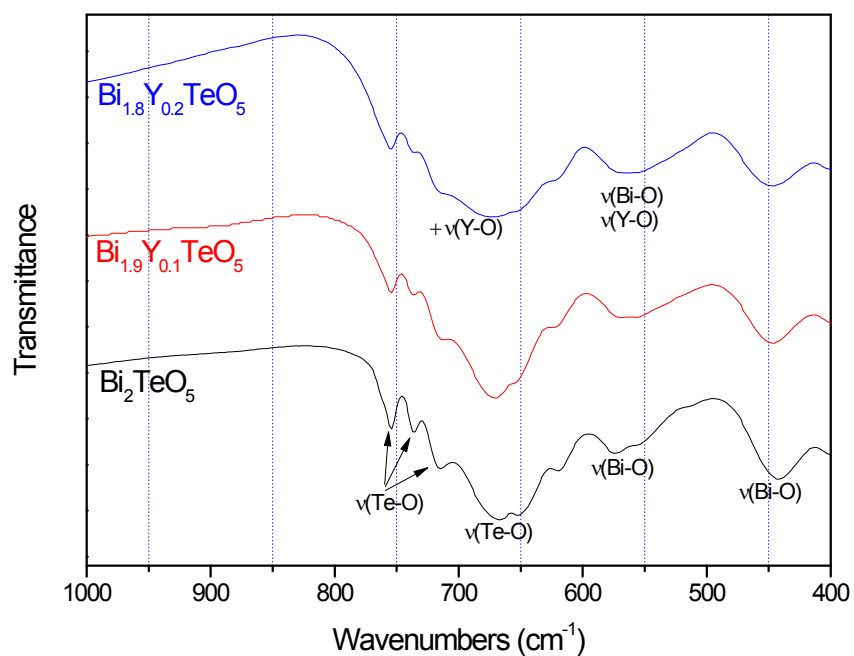

Figure S2. Phase matching, i.e., particle size vs. SHG intensity data for  $\text{Bi}_2\text{TeO}_5$ . The curve is drawn to guide the eye and is not a fit to the data.

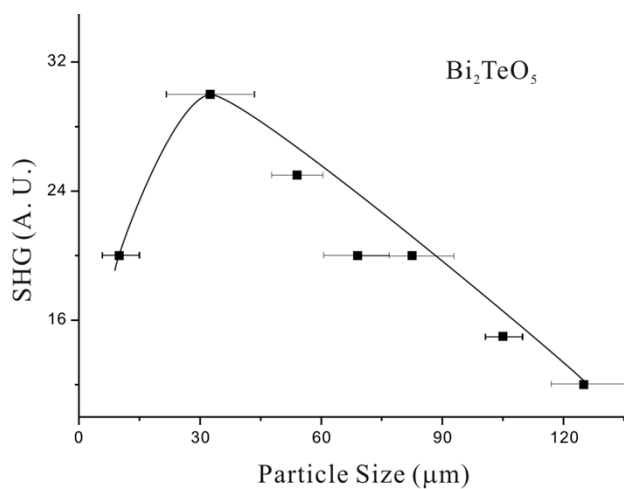

Figure S3. Phase matching, i.e., particle size vs. SHG intensity data for  $\text{Bi}_{1.9}\text{Y}_{0.1}\text{TeO}_5$ . The curve is drawn to guide the eye and is not a fit to the data.

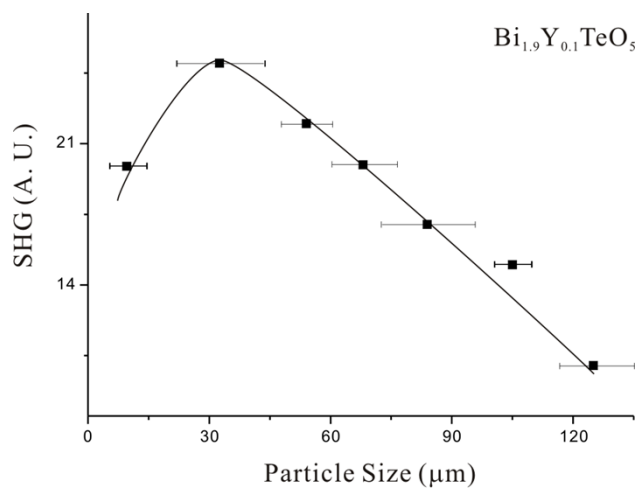

Figure S4. Phase matching, i.e., particle size vs. SHG intensity data for  $\text{Bi}_{1.8}\text{Y}_{0.2}\text{TeO}_5$ . The curve is drawn to guide the eye and is not a fit to the data.

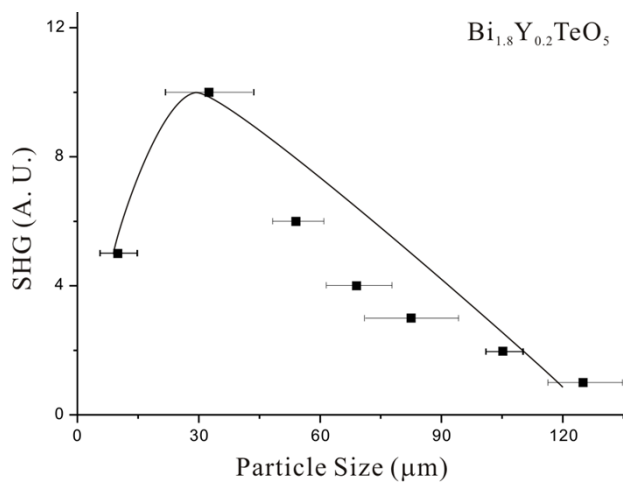

Figure S5. EDAX spectra for  $\text{Bi}_{2-x}\text{Y}_x\text{TeO}_5$  ( $x = 0, 0.1, \text{ and } 0.2$ )

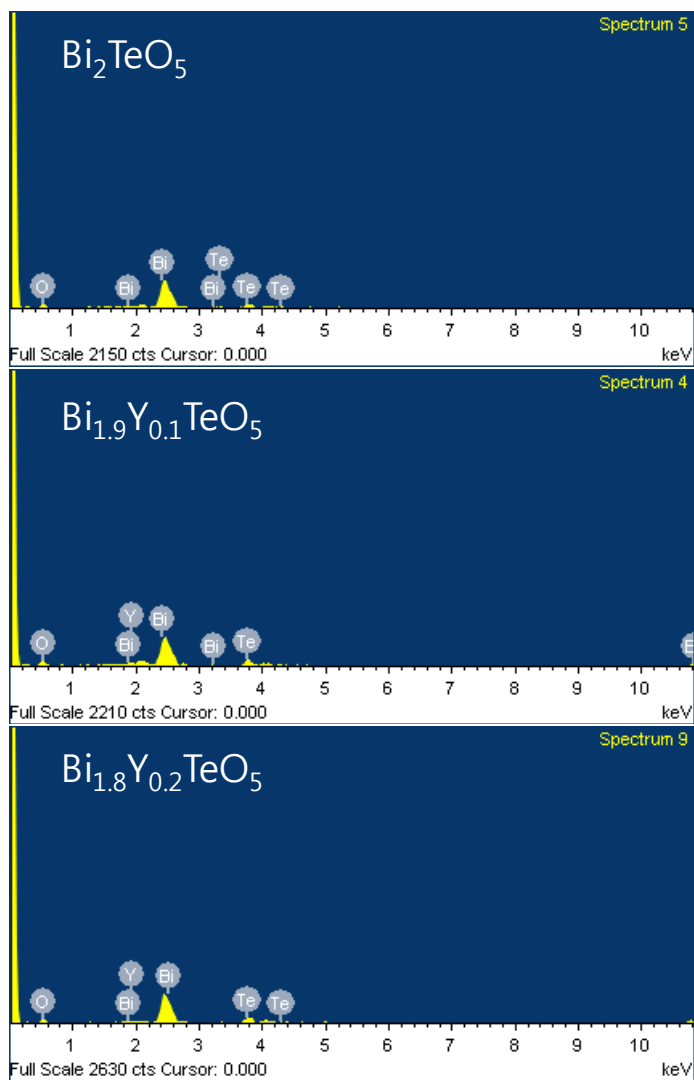

Supplement: c4dt01060d1.pdf [file c4dt01060d1.pdf]
